# Supplementary material for: A “turn-on” fluorescent and colorimetric chemodosimeter for selective detection of Au3+ions in solution and in live cellsviaAu3+-induced hydrolysis of a rhodamine-derived Schiff base
Source: Royal Society of Chemistry journal article supplement (doi:10.1039/d0nj01273d), 2020-01-01
Supplement: d0nj01273d1.pdf [file d0nj01273d1.pdf]

## **Electronic Supplementary Information (ESI†)**

### **A “turn-on” fluorescent and colorimetric chemodosimeter for selective detection of Au<sup>3+</sup> ions in solution and in live cells via Au<sup>3+</sup> -induced hydrolysis of rhodamine-derivative Schiff base**

Sanchita Mondal,<sup>\*,a</sup> Saikat Kumar Manna,<sup>b</sup> Sudipta Pathak,<sup>b</sup> Aritri Ghosh,<sup>c</sup> Pallab Datta,<sup>c</sup> Debasish Mandal,<sup>d</sup> and Subrata Mukhopadhyay<sup>a</sup>

<sup>a</sup>Department of Chemistry, Jadavpur University, Kolkata 700032, India

<sup>b</sup>Department of Chemistry, Haldia Government College, Debhog, Purba Medinipur, West Bengal 721657, India

<sup>c</sup>Centre for Health Care Science, Indian Institute of Engineering Science and Technology, Shibpur, Howrah 711103, India

<sup>d</sup>School of Chemistry and Biochemistry, THAPAR Institute of Engineering and Technology, Patiala 147004, Punjab, India

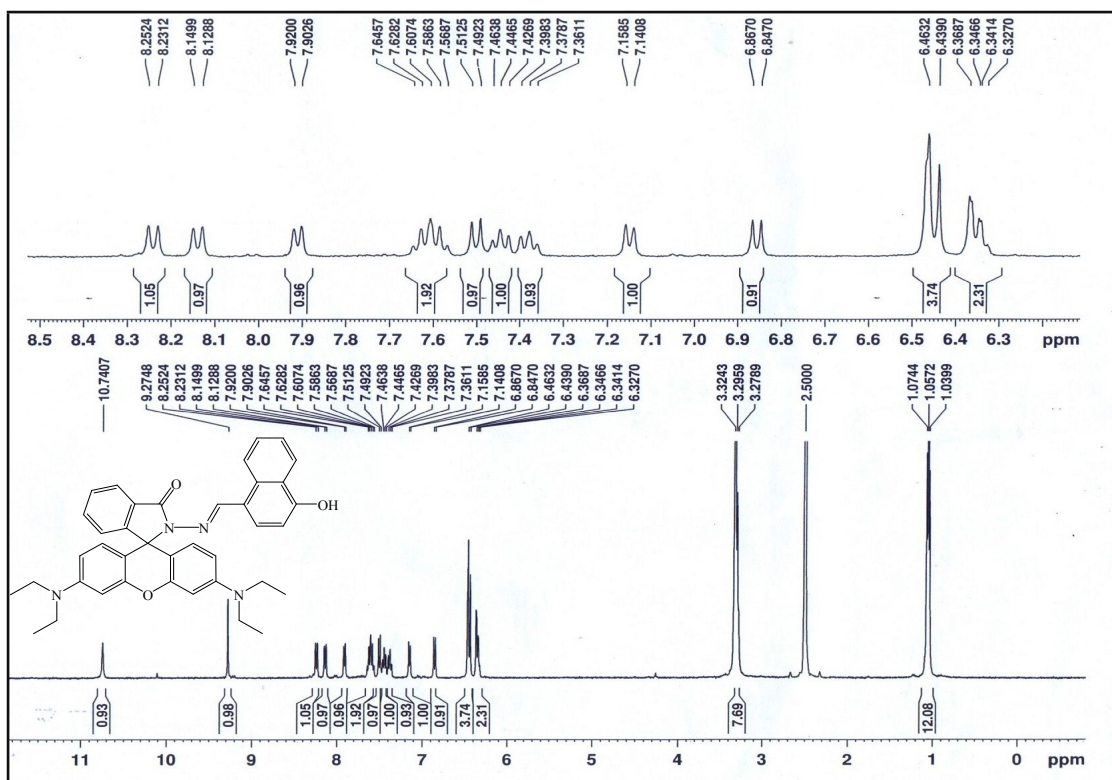

**Figure S1:**  $^1\text{H}$  NMR spectrum of compound 2 in  $\text{DMSO-d}_6$ .

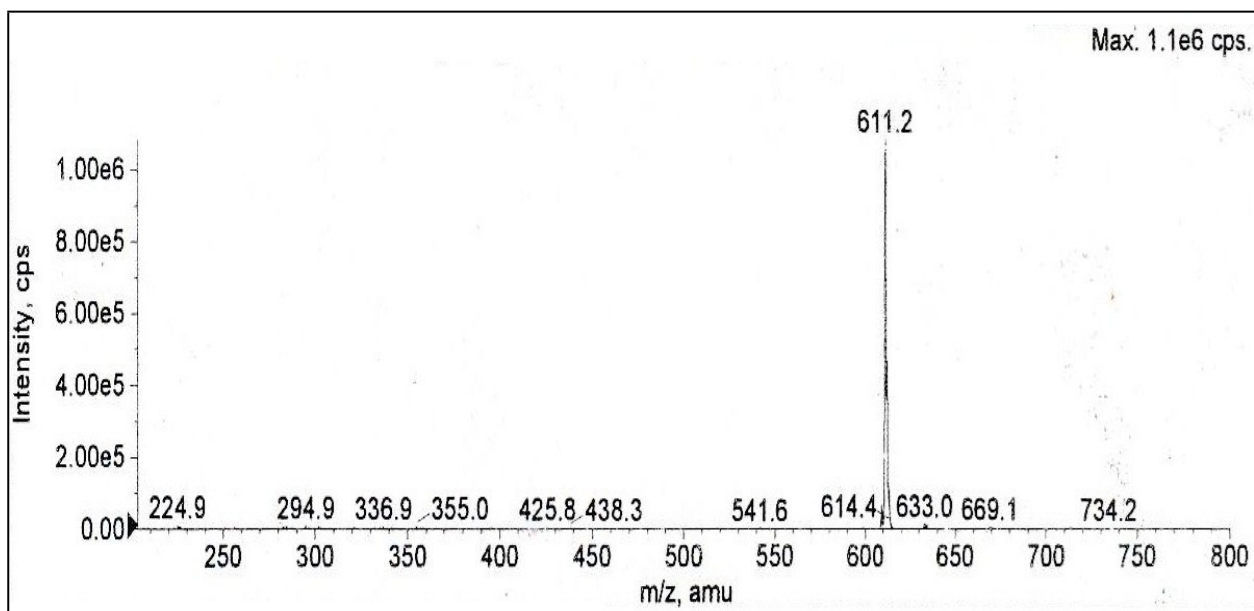

**Figure S2:** Mass spectrum of compound 2.

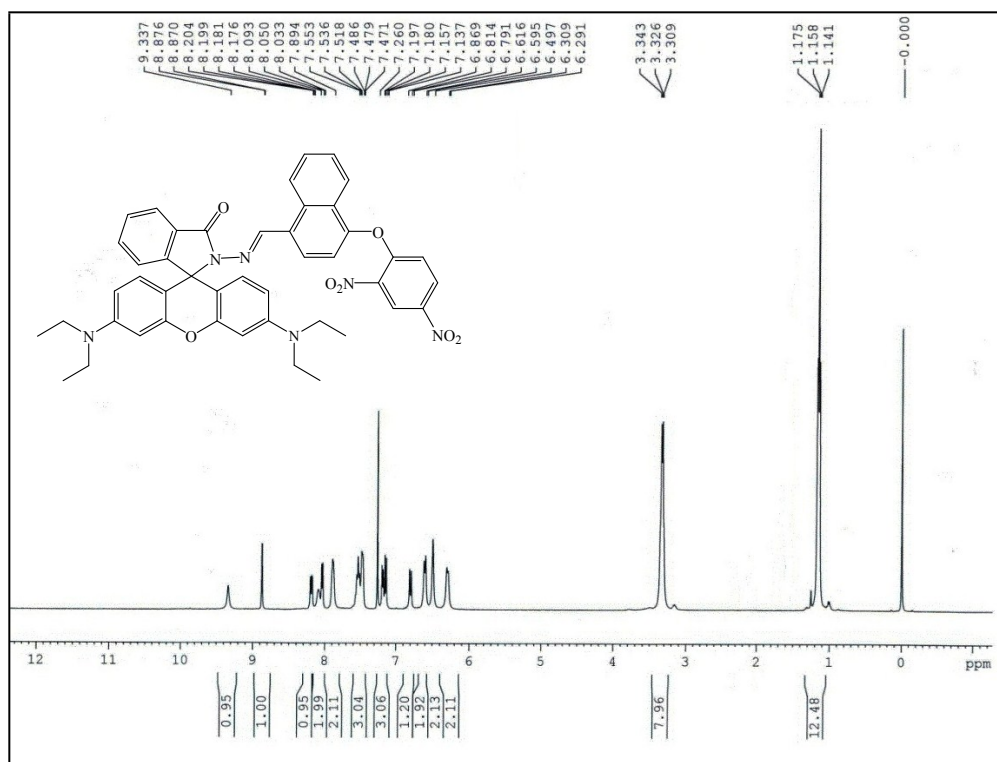

**Figure S3:** <sup>1</sup>H NMR spectrum of probe L in CDCl<sub>3</sub> solution.

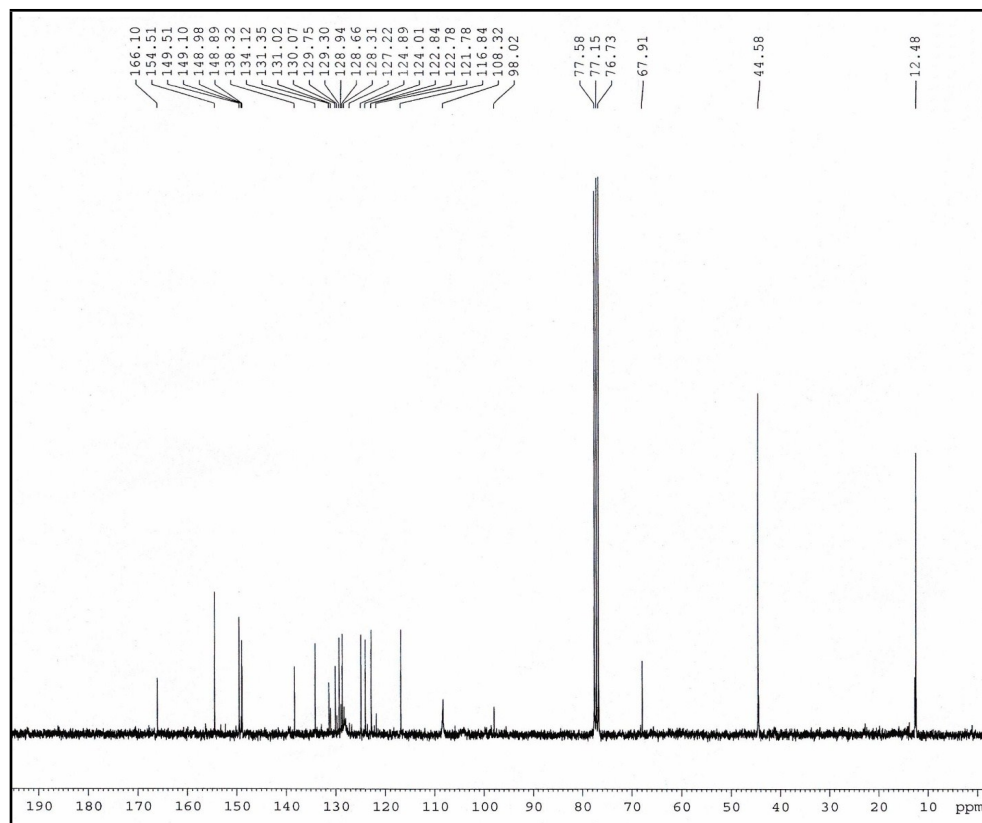

**Figure S4:** <sup>13</sup>C NMR spectrum of probe L in CDCl<sub>3</sub> solution.

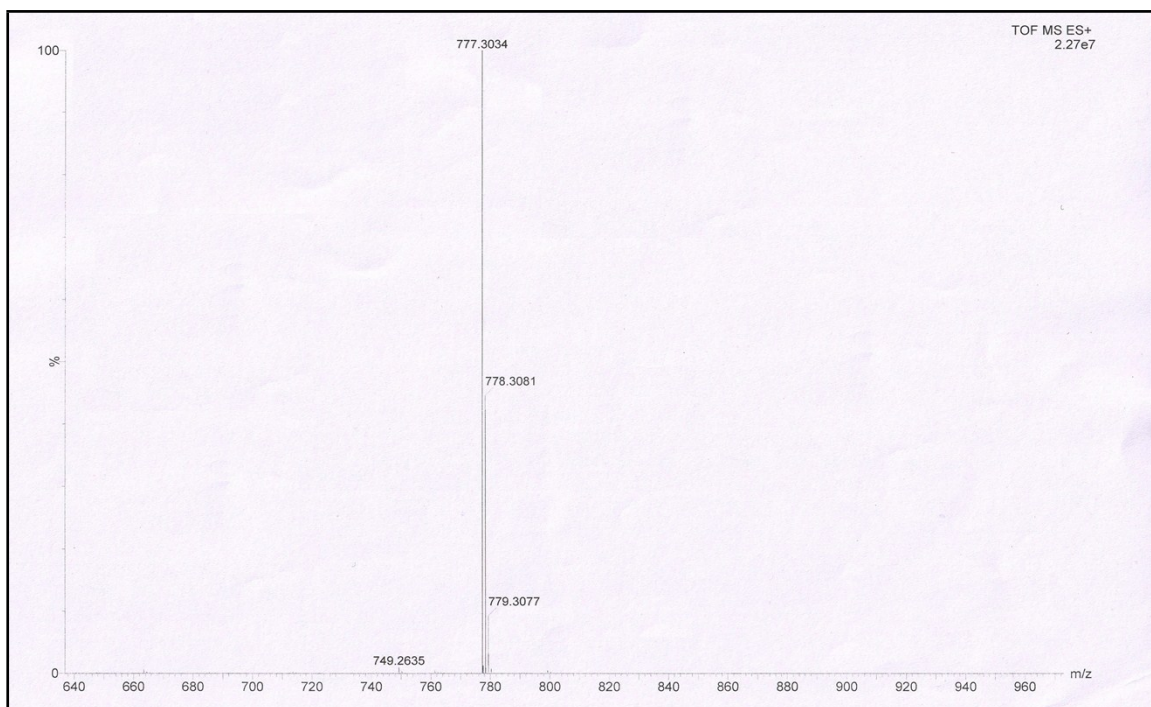

**Figure S5:** Mass spectrum of probe **L**.

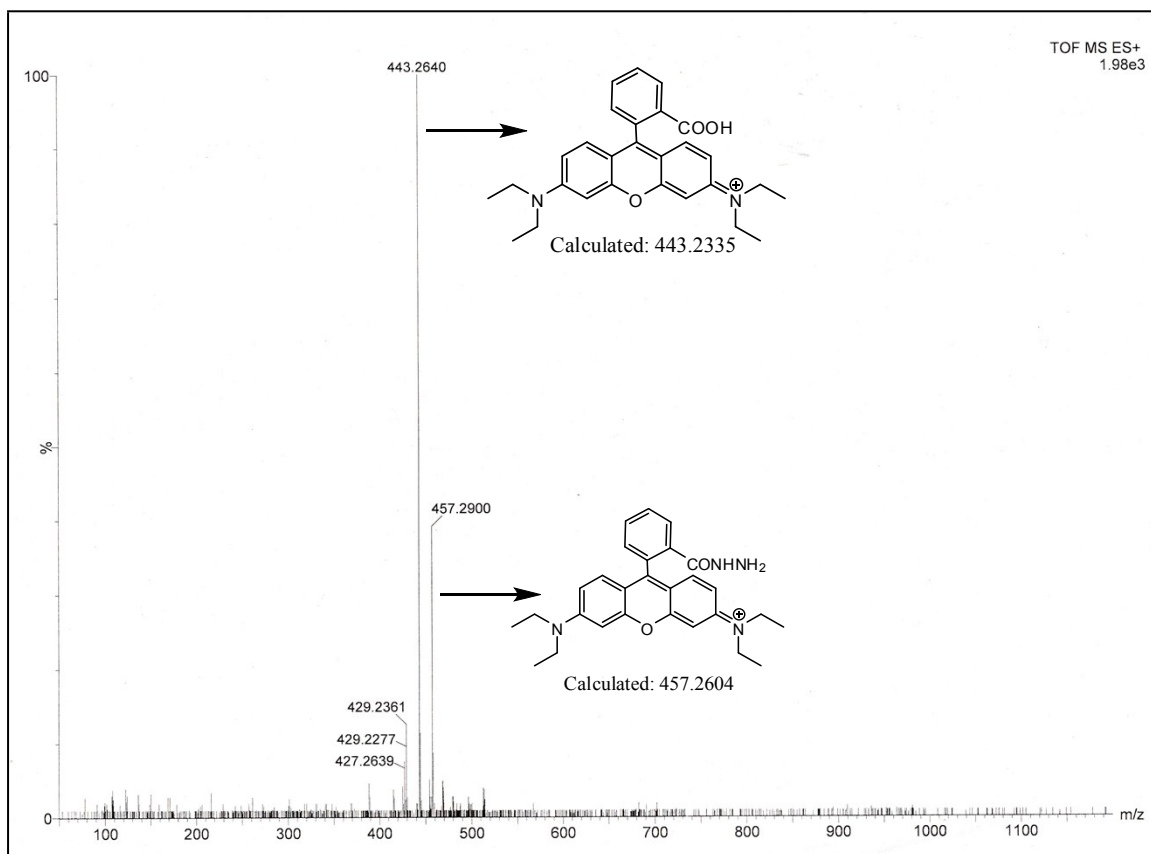

**Figure S6:** Mass spectrum of hydrolysis products of **L** by  $\text{Au}^{3+}$  ions.

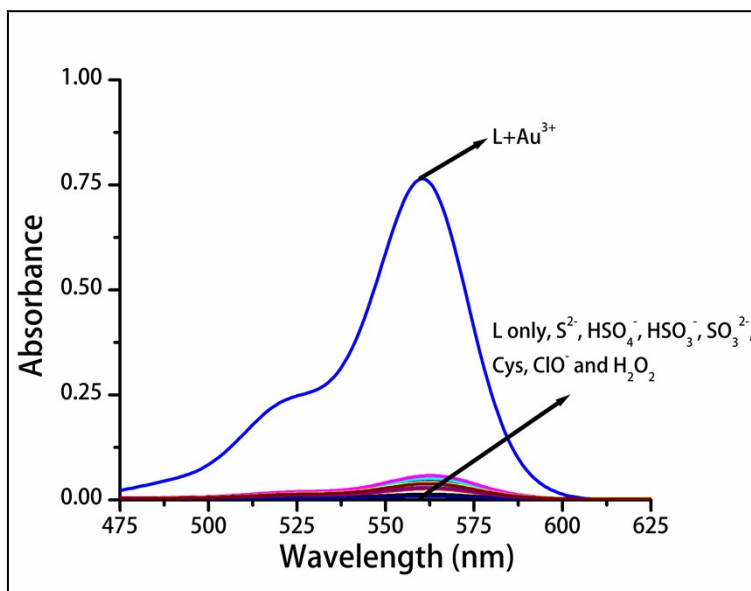

**Figure S7:** UV-vis absorption spectra of **L** ( $1.0 \times 10^{-5}$  M) in the presence of various anions, amino acid and reactive oxygen species ( $1.0 \times 10^{-4}$  M) in  $\text{CH}_3\text{CN}/\text{H}_2\text{O}$  (1: 1, v/v, 10 mM HEPES buffer, pH 7.4) solution.

### Calculation for Limit of Detection (LOD):

The LOD of **L** for  $\text{Au}^{3+}$  was determined using the following equation:

$\text{LOD} = 3\text{Sbl}/\text{S}$ ,  $\text{Sbl}$  is the standard deviation of the blank solution;  $\text{S}$  is the slope of the calibration curve.

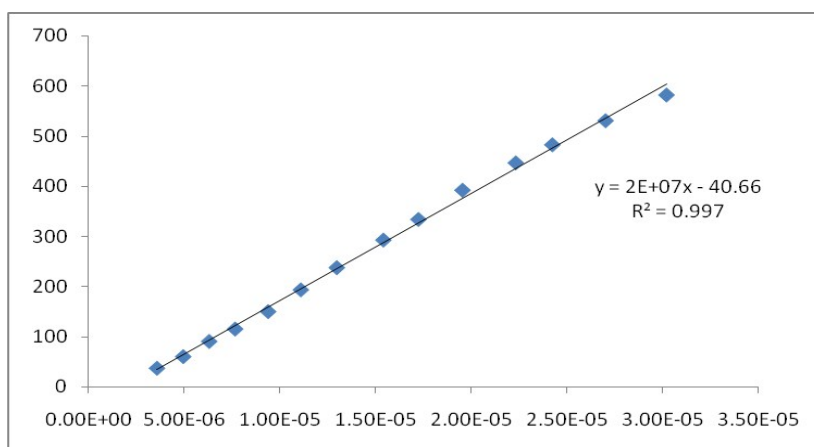

**Figure S8:** Calibration curve for fluorescence titration of **L** with  $\text{Au}^{3+}$ .

From the graph we get slope ( $\text{S}$ ) =  $2 \times 10^7$  Standard deviation ( $\text{Sbl} = 10.05925$ )

Thus, using the formula, we get the  $\text{LOD} = 1.508887 \times 10^{-6}$  M = 1.51  $\mu\text{M}$ .

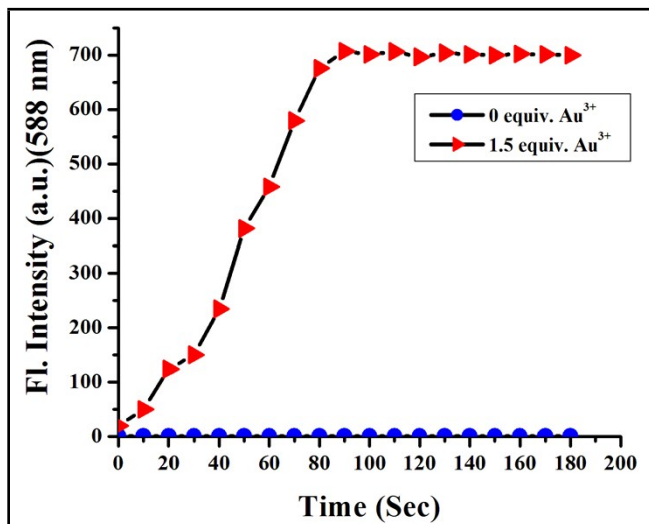

**Figure S9:** Time dependent change of emission intensity of probe **L** in the absence and presence of 1.5 equivalent  $\text{Au}^{3+}$  ions in  $\text{CH}_3\text{CN}/\text{H}_2\text{O}$  (1 : 1, v/v, 10 mM HEPES buffer, pH 7.4) solution ( $\lambda_{\text{ext}} = 560 \text{ nm}$ ).

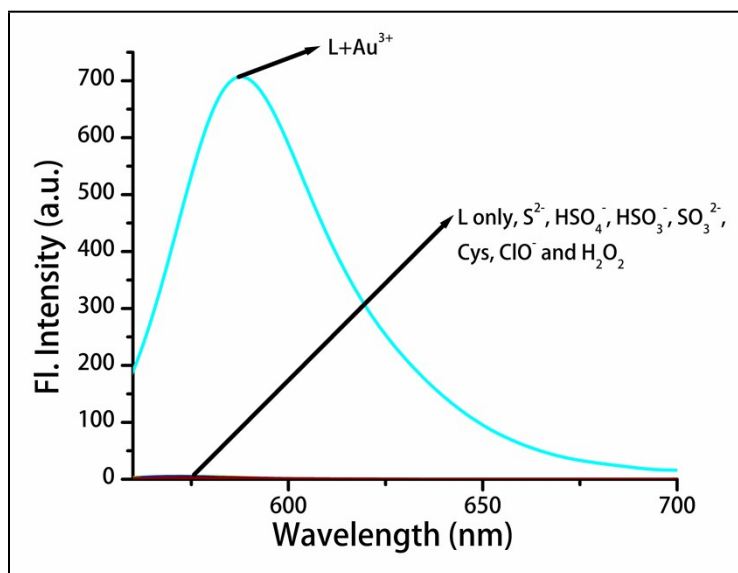

**Figure S10:** Fluorescence emission spectra of **L** ( $1.0 \times 10^{-5} \text{ M}$ ) in the presence of various anions, amino acid and reactive oxygen species ( $1.0 \times 10^{-4} \text{ M}$ ) in  $\text{CH}_3\text{CN}/\text{H}_2\text{O}$  (1: 1, v/v, 10 mM HEPES buffer, pH 7.4) solution.  $\lambda_{\text{ext}} = 560 \text{ nm}$ .



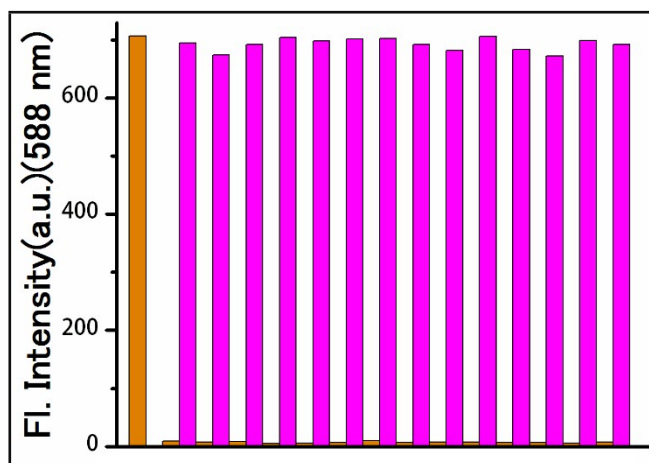

**Figure S11:** Fluorescence response of **L** ( $c = 1.0 \times 10^{-5}$  M) to 1.5 equiv. addition of Au<sup>3+</sup> (the orange bar portion) and to the mixture of 10 equiv. of other metal ions with 1.0 equiv. of Au<sup>3+</sup> (the magenta bar portion, left to right- Cr<sup>3+</sup>, Mn<sup>2+</sup>, Fe<sup>3+</sup>, Co<sup>2+</sup>, Ni<sup>2+</sup>, Cu<sup>2+</sup>, Zn<sup>2+</sup>, Cd<sup>2+</sup>, Pb<sup>2+</sup>, Hg<sup>2+</sup>, Pt<sup>2+</sup>, Pd<sup>2+</sup>, Al<sup>3+</sup> and Ag<sup>+</sup>).

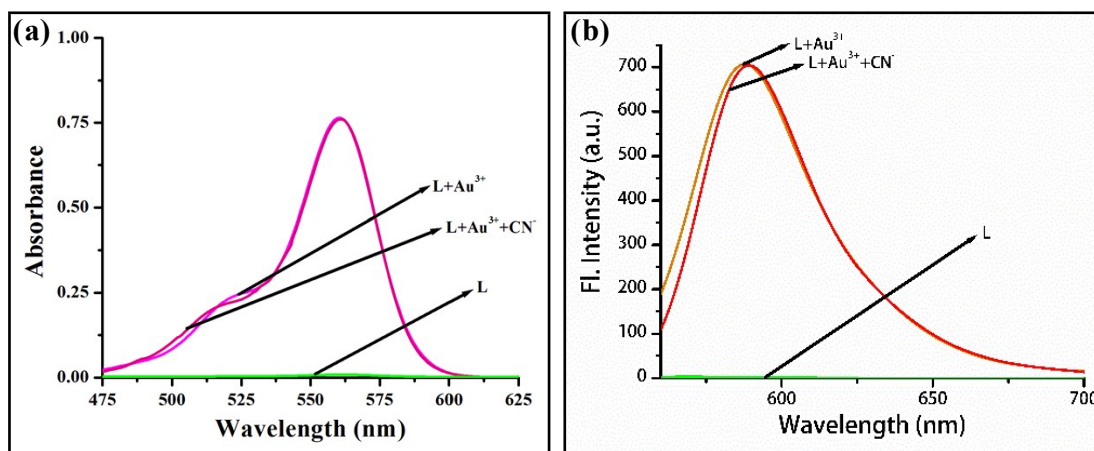

**Figure S12:** (a) UV-vis absorption spectra of **L** ( $c = 1.0 \times 10^{-5}$  M) to 1.5 equiv addition of Au<sup>3+</sup> (the magenta graph) and to the mixture of 10 equiv. of <sup>t</sup>Bu<sub>4</sub>NCN ions with 1.5 equiv. of Au<sup>3+</sup> (the pink graph); (b) Fluorescence response of **L** ( $c = 1.0 \times 10^{-5}$  M) to 1.5 equiv addition of Au<sup>3+</sup> (the orange graph) and to the mixture of 10 equiv. of <sup>t</sup>Bu<sub>4</sub>NCN ions with 1.5 equiv. of Au<sup>3+</sup> (the red graph).

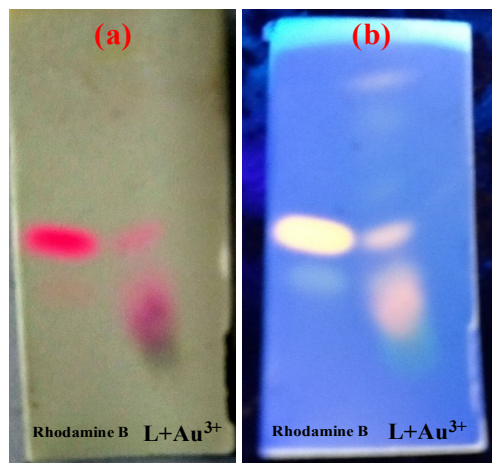

**Figure S13:** TLC study of pure rhodamine B and L+Au<sup>3+</sup> (a) under visible light and (b) under UV light.

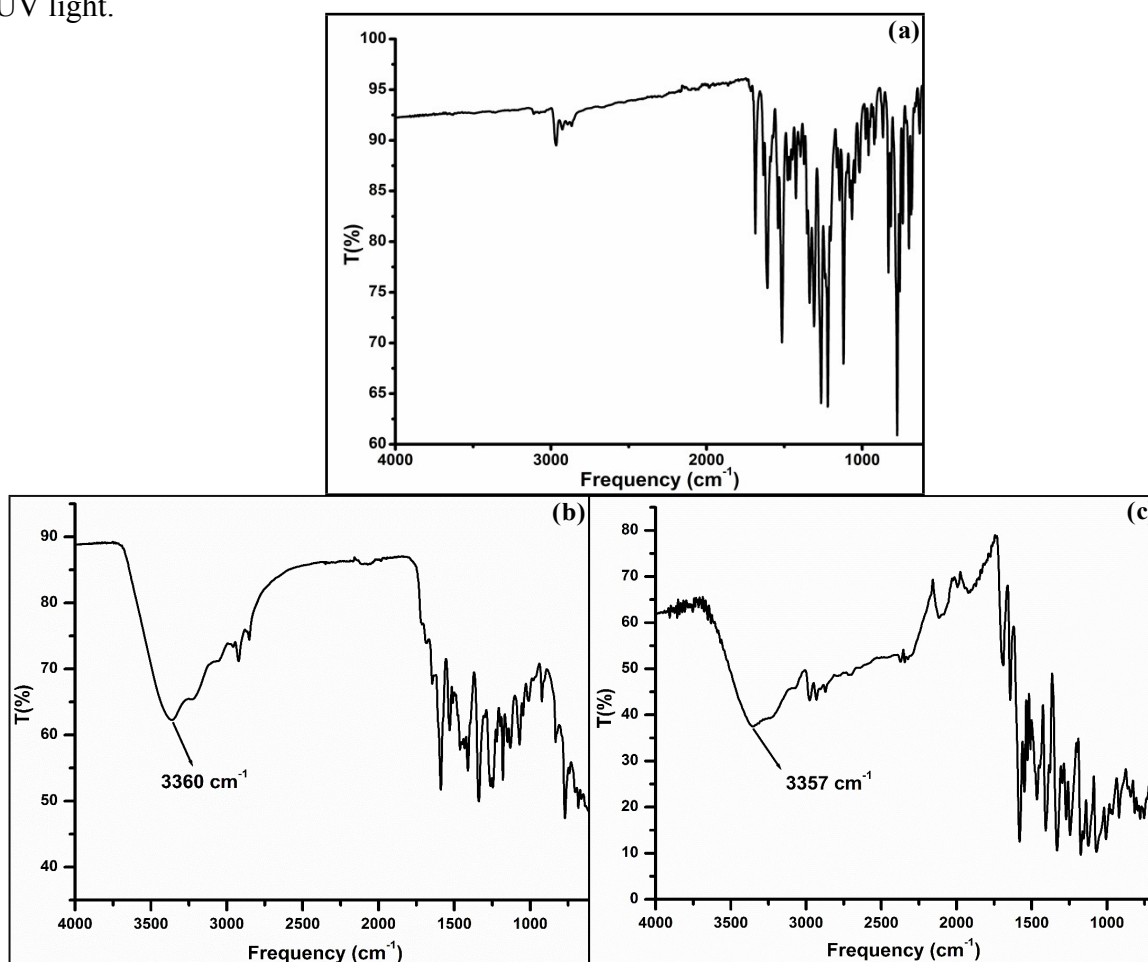

**Figure S14:** FTIR spectra of (a) L; (b) L+Au<sup>3+</sup> and (c) pure rhodamine B.



**Table S1.** The comparison of the present probe **L** with other reported probes for Au<sup>3+</sup> ions

| Sl. No. | Structure of Probe                                                                                                                                         | Media                                                                      | Detection limit          | Theoretical calculation | Biological application                                                                           |
|---------|------------------------------------------------------------------------------------------------------------------------------------------------------------|----------------------------------------------------------------------------|--------------------------|-------------------------|--------------------------------------------------------------------------------------------------|
| 1.      | <p><b>Our Probe</b></p> 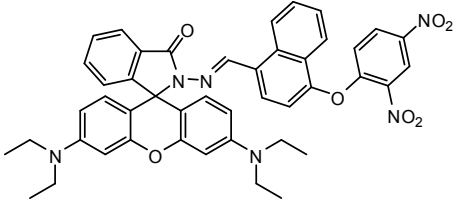                                                  | CH <sub>3</sub> CN/H <sub>2</sub> O (1:1, v/v, 10 mM HEPES buffer, pH 7.4) | 1.51 μM                  | Yes                     | Our chemodosimeter can detect and image intracellular Au <sup>3+</sup> ions in MDA- MC3T3 cells. |
| 2.      |  <p>(<i>Organic Letters</i>, 2010, <b>12</b>, 5310-5313)<sup>1</sup></p> | HEPES buffer (0.01 M, pH 7.4) (0.05% DMSO, v/v)                            | 0.05 μM (10 ppb)         | No                      | No                                                                                               |
| 3.      |  <p>(<i>Chem. Eur. J.</i> 2011, <b>17</b>, 9066 – 9069)<sup>2</sup></p> | Phosphate buffer (pH 7.2) (0.15% CH <sub>3</sub> CN, v/v)                  | 3.9 × 10 <sup>-7</sup> M | No                      | No                                                                                               |

|    |                                                                                                                                                      |                                                                                            |                          |    |    |
|----|------------------------------------------------------------------------------------------------------------------------------------------------------|--------------------------------------------------------------------------------------------|--------------------------|----|----|
| 4. | 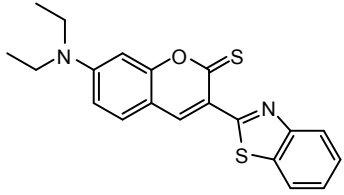 <p>(<i>Inorg. Chem.</i> 2012, 51, 2880–2884)<sup>3</sup></p>       | In a mixture of CH <sub>3</sub> CN and acetate buffer solution (pH 4.7, 10 mM) (1:1, v/v). | 1.1 × 10 <sup>-7</sup> M | No | No |
| 5. |  <p>(<i>Tetrahedron</i> 2013, 69, 2048-2051)<sup>4</sup></p>        | Phosphate buffer (pH 7.2) (0.15% CH <sub>3</sub> CN, v/v)                                  | No                       | No | No |
| 6. |  <p>(<i>Anal. Methods</i>, 2013, 5, 3639–3641)<sup>5</sup></p>     | HEPES buffer                                                                               | 4.4 × 10 <sup>-7</sup> M | No | No |
| 7. |  <p>(<i>Dyes and Pigments</i> 2015, 112, 236-238)<sup>6</sup></p> | Mixture of CH <sub>3</sub> CN and 10 mM, pH 8.0 PBS buffer solution (1/1, v/v)             | 95 ppb                   | No | No |

|    |                                                                                                                                                        |                                                                          |                                    |    |    |
|----|--------------------------------------------------------------------------------------------------------------------------------------------------------|--------------------------------------------------------------------------|------------------------------------|----|----|
| 8. | 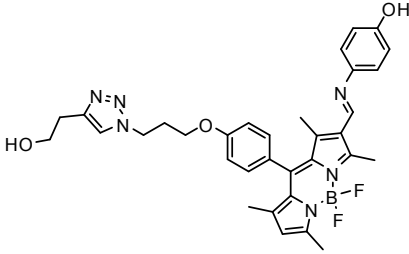 <p>(<i>RSC Advances</i> 2015, <b>5</b>, 82887-82893)<sup>7</sup></p> | THF-H <sub>2</sub> O buffered with 10 mM HEPES (2 μM)                    | 10 nM                              | No | No |
| 9. |  <p>(<i>Dyes and Pigments</i> 2019, <b>164</b>,14-19)<sup>8</sup></p> | 1:1 (v/v) mixture of acetate buffer solution (pH = 4.76, 20 mM) and DMSO | 4.8 × 10 <sup>-8</sup> M (9.5 ppb) | No | No |

\*1 Starting materials for the synthesis of our probe **L** are easily available compared to the reported compound.

\*2 The synthetic steps for the probe recorded are more than our probe and a few steps are of low yield.

\*3 Compared to the synthesis of **L** (our work), yield of the reported compound is low.

\*4 The reported compound detects Au<sup>3+</sup> ions through ‘turn-off’ mechanism. However, a ‘turn-on’ chemosensor (fluorescence enhanced) would be more efficient for metal ion detection.

\*5 Yield of the reported compound is low.

\*6 Our probe shows 696-fold fluorescence enhancement in presence of Au<sup>3+</sup> ions compared to the reported probe (9-fold).

\*7 The synthetic steps for the probe recorded are more than our probe. Our probe **L** selectively detects Au<sup>3+</sup> ions whereas the reported probe is sensitive not only to Au<sup>3+</sup> ions, but also to Hg<sup>2+</sup>, Fe<sup>3+</sup>.

\*8 Yield of the reported probe is low.

\*1-8 None of the above-mentioned tabulated probes, except ours, reported their biological applications.

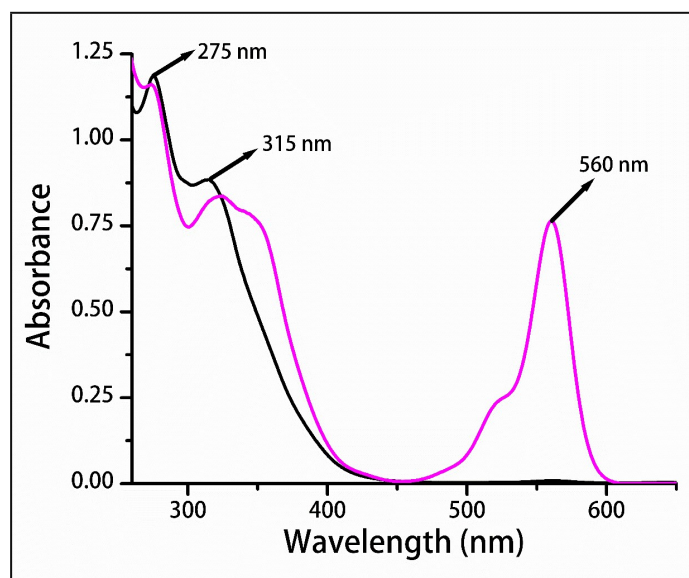

**Figure S15:** UV-vis spectra of (a) **L** (black); (b) **L** + Au<sup>3+</sup> (magenta color).

**Theoretical study:**

**Table S2.** Calculated excitation energies (eV), oscillator strengths (f), contributions for **L**, **I<sub>2</sub>** and **P**. The data were calculated by the TDDFT//B3LYP/6-31+G(*d,p*) level of theory based on the optimized ground state geometries.

| Species              | Electronic Transition            | Excitation Energy   | f      | Contributions <sup>a</sup> |
|----------------------|----------------------------------|---------------------|--------|----------------------------|
| <b>L</b>             | S <sub>0</sub> → S <sub>11</sub> | 3.3025 eV 375.43 nm | 0.8188 | H-1 → L+2 (93%)            |
|                      | S <sub>0</sub> → S <sub>29</sub> | 4.0045 eV 309.61 nm | 0.2111 | H -10 → L (52%)            |
| <b>I<sub>2</sub></b> | S <sub>0</sub> → S <sub>1</sub>  | 2.5763 eV 481.24 nm | 0.9883 | H → L (99%)                |
|                      | S <sub>0</sub> → S <sub>17</sub> | 4.9369 eV 251.14 nm | 0.4577 | H - 1 → L + 2 (80%)        |
| <b>P</b>             | S <sub>0</sub> → S <sub>1</sub>  | 2.5238 eV 491.26 nm | 0.9900 | H → L (99%)                |
|                      | S <sub>0</sub> → S <sub>16</sub> | 4.9031 eV 252.87 nm | 0.5616 | H → L (99%)                |
|                      |                                  |                     |        |                            |

<sup>a</sup> H and L represents HOMO and LUMO respectively.

**Table S3.** Energies of the highest occupied molecular orbital (HOMO) and lowest unoccupied molecular orbital (LUMO)

| <b>Species</b>       | <b>E<sub>HOMO</sub> (a.u)</b> | <b>E<sub>LUMO</sub> (a.u)</b> | <b>ΔE (a.u)</b> | <b>ΔE (eV)</b> | <b>ΔE (kcal/mol)</b> |
|----------------------|-------------------------------|-------------------------------|-----------------|----------------|----------------------|
| <b>L</b>             | -0.19977                      | -0.1200                       | 0.07977         | 2.170669332    | 50.1                 |
| <b>I<sub>2</sub></b> | -0.21700                      | -0.1145                       | 0.10250         | 2.789189000    | 64.3                 |
| <b>P</b>             | -0.22087                      | -0.1212                       | 0.09966         | 2.711908056    | 62.5                 |

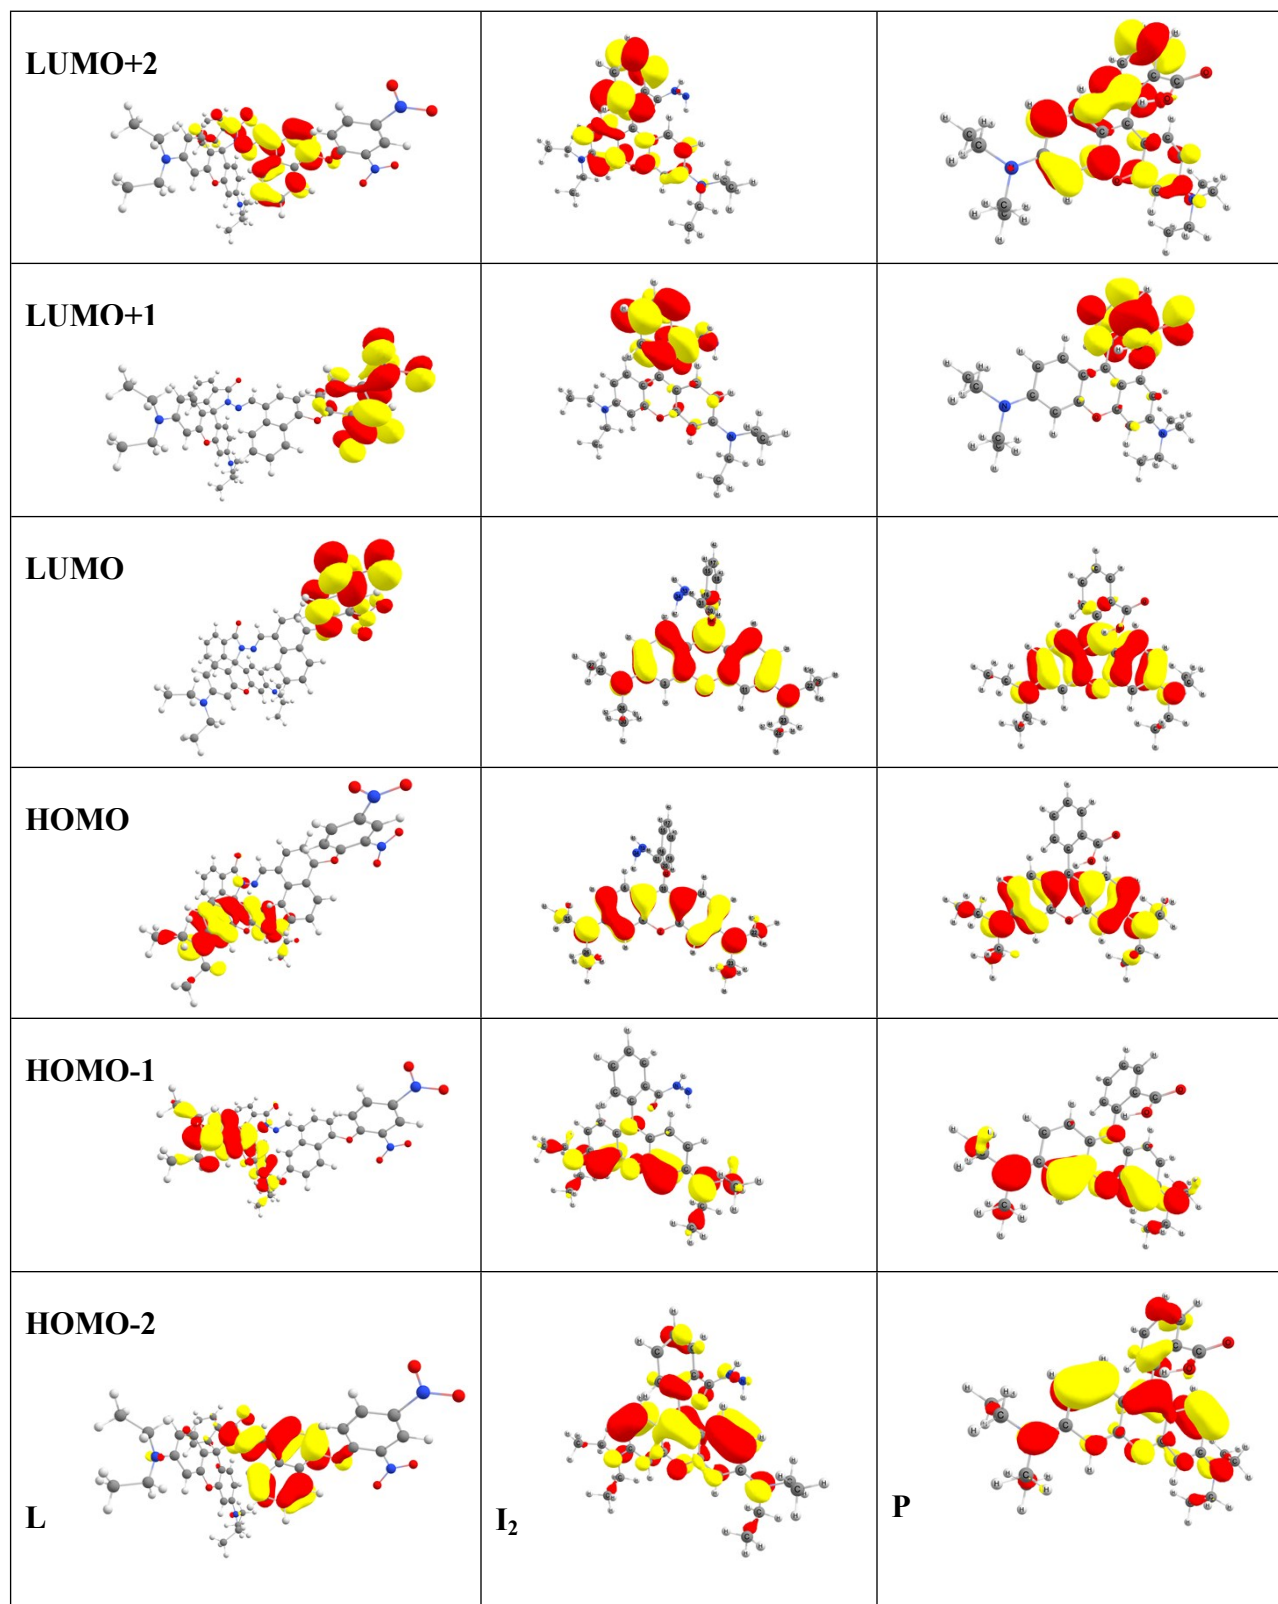

Figure S16: Molecular orbital plots of L, I<sub>2</sub> and P.



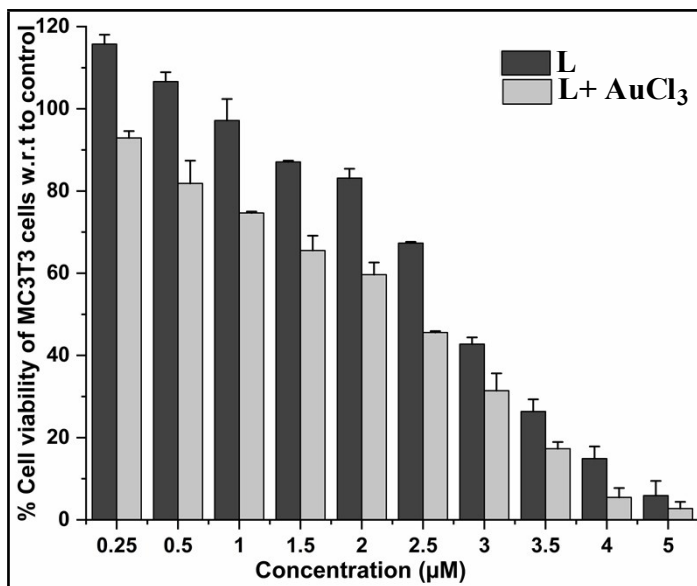

**Figure S17:** MTT assay studies.

**Quantum yield ( $\phi$ ) calculation:**

Here, the quantum yield  $\phi$  was measured by using the following equation:

$$\phi_x = \phi_s (F_x / F_s) (A_s / A_x) (n_x^2 / n_s^2)$$

Where,

X & S indicate the unknown and standard solution respectively,  $\phi$  = quantum yield,

F = area under the emission curve, A = absorbance at the excitation wave length,

n = index of refraction of the solvent. Here  $\phi$  measurements were performed using Rhodamine B in ethanol as standard [ $\phi = 0.69$ ]

For standard (s) rhodamine B in ethanol the following values were determined:

$$n_s = 1.3614 \text{ (for ethanol); } n_x = 1.3441 \text{ (for acetonitrile); } \phi_s = 0.69.$$

We calculated the quantum yield of **L** using the above equation and the value was found to be 0.001.

We calculated the quantum yield of **L** in presence of  $\text{Au}^{3+}$  ions using the above equation and the value was found to be 0.689.
